# Supplementary material for: Activities of Manogepix and Comparators against 1,435 Recent Fungal Isolates Collected during an International Surveillance Program (2020)
Source: PubMed Central journal article supplement (PMC9664852; doi:10.1128/aac.01028-22), 2022-10-26
Supplement: aac.01028-22-s0001.pdf [file aac.01028-22-s0001.pdf]

## SUPPLEMENTAL TABLES

**Table S1.** *In vitro* activity of manogepix and comparators against 50 other yeast isolates

| Organism                        | MIC (mg/L) |               |             |            |             |              |                |
|---------------------------------|------------|---------------|-------------|------------|-------------|--------------|----------------|
|                                 | Manogepix  | Anidulafungin | Caspofungin | Micafungin | Fluconazole | Voriconazole | Amphotericin B |
| <i>Candida bracarensis</i>      | 0.004      | 0.12          | 0.06        | 0.015      | 1           | 0.03         | 0.5            |
| <i>Candida bracarensis</i>      | 0.008      | 0.12          | 0.06        | 0.03       | 2           | 0.06         | 0.5            |
| <i>Candida duobushaemulonii</i> | ≤0.002     | 0.12          | 0.03        | 0.06       | 128         | 0.5          | 2              |
| <i>Candida fermentati</i>       | 0.03       | 1             | 0.5         | 0.5        | 8           | 0.25         | 0.5            |
| <i>Candida fermentati</i>       | 0.03       | 0.5           | 0.25        | 0.25       | 8           | 0.12         | 0.5            |
| <i>Candida guilliermondii</i>   | 0.004      | 1             | 0.25        | 0.5        | 2           | 0.03         | 0.5            |
| <i>Candida guilliermondii</i>   | 0.008      | 2             | 0.12        | 0.5        | 2           | 0.06         | 1              |
| <i>Candida guilliermondii</i>   | 0.015      | 2             | 0.25        | 1          | 2           | 0.06         | 0.5            |
| <i>Candida guilliermondii</i>   | 0.015      | 4             | 0.25        | 0.5        | 8           | 0.12         | 0.5            |
| <i>Candida guilliermondii</i>   | 0.004      | 2             | 0.5         | 0.5        | 2           | 0.06         | 0.5            |
| <i>Candida guilliermondii</i>   | 0.004      | 2             | 0.25        | 0.5        | 4           | 0.12         | 0.5            |
| <i>Candida haemulonii</i>       | ≤0.002     | 0.25          | 0.06        | 0.12       | 0.5         | 0.008        | 1              |
| <i>Candida inconspicua</i>      | 0.5        | 0.03          | 0.06        | 0.015      | 32          | 0.12         | 0.25           |
| <i>Candida inconspicua</i>      | 2          | 0.03          | 0.03        | 0.015      | 16          | 0.12         | 0.5            |
| <i>Candida nivariensis</i>      | 0.004      | 0.06          | 0.03        | 0.015      | 4           | 0.06         | 1              |
| <i>Candida pelliculosa</i>      | ≤0.002     | 0.015         | 0.015       | 0.03       | 2           | 0.12         | 1              |
| <i>Candida pelliculosa</i>      | ≤0.002     | 0.015         | 0.03        | 0.03       | 4           | 0.25         | 0.5            |
| <i>Candida pelliculosa</i>      | ≤0.002     | 0.015         | 0.015       | 0.03       | 4           | 0.12         | 1              |
| <i>Candida pelliculosa</i>      | ≤0.002     | 0.015         | 0.015       | 0.06       | 2           | 0.12         | 0.5            |
| <i>Candida rugosa</i>           | 0.008      | 0.06          | 0.12        | 0.06       | 8           | 0.06         | 0.5            |

| Organism                                              | MIC (mg/L) |               |             |            |             |              |                |
|-------------------------------------------------------|------------|---------------|-------------|------------|-------------|--------------|----------------|
|                                                       | Manogepix  | Anidulafungin | Caspofungin | Micafungin | Fluconazole | Voriconazole | Amphotericin B |
| <i>Candida rugosa</i>                                 | 0.03       | 0.5           | 0.25        | 0.06       | 2           | 0.015        | 1              |
| <i>Candida spencermartinsiae</i>                      | 0.008      | 0.5           | 0.12        | 0.25       | 4           | 0.06         | 0.5            |
| <i>Candida utilis</i>                                 | ≤0.002     | 0.015         | 0.015       | 0.015      | 2           | 0.12         | 0.12           |
| <i>Candida utilis</i>                                 | ≤0.002     | 0.03          | 0.015       | 0.03       | 2           | 0.12         | 0.5            |
| <i>Cryptococcus gattii</i> species complex            | 0.25       | >4            | >4          | >4         | 4           | 0.06         | 0.5            |
| <i>Cryptococcus neoformans</i> var. <i>neoformans</i> | 0.12       | >4            | >4          | >4         | 1           | 0.015        | 0.5            |
| <i>Cryptococcus neoformans</i> var. <i>neoformans</i> | 1          | >4            | >4          | >4         | 2           | 0.03         | 0.5            |
| <i>Saprochaete clavata</i>                            | 0.06       | 4             | >4          | >4         | 16          | 0.5          | 1              |
| <i>Saprochaete clavata</i>                            | 0.03       | 4             | >4          | >4         | 4           | 0.12         | 1              |
| <i>Saprochaete clavata</i>                            | 0.03       | 4             | >4          | >4         | 16          | 0.25         | 1              |
| <i>Kodamaea ohmeri</i>                                | 0.008      | 1             | 0.25        | 0.5        | 4           | 0.03         | 0.5            |
| <i>Magnusiomyces capitatus</i>                        | 0.015      | 4             | 4           | >4         | 1           | 0.06         | 1              |
| <i>Rhodotorula mucilaginosa</i>                       | 0.03       | >4            | >4          | >4         | 32          | 0.12         | 0.5            |
| <i>Rhodotorula mucilaginosa</i>                       | 0.06       | >4            | >4          | >4         | 64          | 0.5          | 0.5            |
| <i>Rhodotorula mucilaginosa</i>                       | 0.06       | >4            | >4          | >4         | >128        | 2            | 0.5            |
| <i>Rhodotorula mucilaginosa</i>                       | 0.03       | >4            | >4          | >4         | >128        | 4            | 0.5            |
| <i>Rhodotorula mucilaginosa</i>                       | 0.03       | >4            | >4          | >4         | >128        | 2            | 0.5            |
| <i>Saccharomyces cerevisiae</i>                       | 0.03       | 0.25          | 0.12        | 0.12       | 16          | 0.25         | 0.5            |
| <i>Saccharomyces cerevisiae</i>                       | 0.008      | 0.12          | 0.12        | 0.06       | 1           | 0.03         | 1              |
| <i>Saccharomyces cerevisiae</i>                       | 0.015      | 0.25          | 0.25        | 0.12       | 4           | 0.12         | 0.5            |
| <i>Saccharomyces cerevisiae</i>                       | 0.015      | 0.12          | 0.06        | 0.12       | 16          | 0.12         | 1              |
| <i>Saccharomyces cerevisiae</i>                       | 0.015      | 0.25          | 0.06        | 0.12       | 4           | 0.06         | 0.5            |

| Organism                             | MIC (mg/L) |               |             |            |             |              |                |
|--------------------------------------|------------|---------------|-------------|------------|-------------|--------------|----------------|
|                                      | Manogepix  | Anidulafungin | Caspofungin | Micafungin | Fluconazole | Voriconazole | Amphotericin B |
| <i>Saccharomyces cerevisiae</i>      | 0.008      | 0.12          | 0.06        | 0.12       | 8           | 0.12         | 0.5            |
| <i>Saccharomyces cerevisiae</i>      | 0.015      | 0.5           | 0.12        | 0.12       | 2           | 0.06         | 0.5            |
| <i>Trichosporon asahii</i>           | >8         | >4            | >4          | >4         | 4           | 0.12         | 1              |
| <i>Trichosporon asahii</i>           | 0.5        | >4            | >4          | >4         | 1           | 0.015        | 1              |
| <i>Trichosporon asahii</i>           | >8         | >4            | >4          | >4         | 16          | 0.12         | 0.5            |
| <i>Trichosporon asahii</i>           | >8         | >4            | >4          | >4         | 128         | 2            | 0.5            |
| <i>Trichosporon mycotoxinivorans</i> | >8         | >4            | >4          | >4         | 8           | 0.25         | 2              |
| <i>Yarrowia lipolytica</i>           | 0.03       | 0.25          | 0.12        | 0.5        | 2           | 0.03         | 1              |

**Table S2.** *In vitro* activity of manogepix and comparators against 63 other mold isolates

| Organism                                            | MIC or MEC (mg/L) |               |             |            |              |              |                |
|-----------------------------------------------------|-------------------|---------------|-------------|------------|--------------|--------------|----------------|
|                                                     | Manogepix         | Anidulafungin | Caspofungin | Micafungin | Posaconazole | Voriconazole | Amphotericin B |
| <i>Aspergillus nidulans</i>                         | 0.015             | 0.015         | 0.008       | 0.004      | 0.25         | 0.12         | 2              |
| <i>Aspergillus nidulans</i>                         | 0.015             | 0.03          | 0.015       | 0.004      | 0.25         | 0.12         | 2              |
| <i>Aspergillus nidulans</i>                         | 0.03              | 0.015         | 0.03        | 0.015      | 0.5          | 0.12         | 2              |
| <i>Aspergillus nidulans</i>                         | 0.015             | 0.015         | 0.008       | 0.004      | 0.25         | 0.12         | 2              |
| <i>Aspergillus nidulans</i>                         | 0.008             | 0.015         | 0.015       | 0.004      | 0.12         | 0.12         | 2              |
| <i>Aspergillus nidulans</i>                         | 0.015             | 0.03          | 0.015       | 0.008      | 0.25         | 0.12         | 2              |
| <i>Aspergillus nidulans</i> species complex         | 0.015             | 0.008         | 0.008       | 0.004      | 0.25         | 0.12         | 2              |
| <i>Aspergillus nidulans</i> species complex         | 0.015             | 0.015         | 0.008       | 0.004      | 0.25         | 0.12         | 1              |
| <i>Aspergillus sclerotiorum</i>                     | 0.015             | 0.03          | 0.015       | 0.03       | 0.5          | 0.5          | >4             |
| <i>Aspergillus ustus</i>                            | 0.008             | 0.03          | 0.015       | 0.015      | 2            | 4            | 1              |
| <i>Aspergillus ustus</i> species complex            | 0.008             | 0.03          | 0.015       | 0.008      | >8           | 8            | 4              |
| <i>Aspergillus versicolor</i>                       | 0.015             | 0.015         | 0.015       | 0.008      | 0.25         | 0.25         | 1              |
| <i>Exophiala dermatitidis</i>                       | ≤0.002            | 0.12          | 0.06        | 0.015      | 0.25         | 0.12         | 1              |
| <i>Fusarium incarnatum-equiseti</i> species complex | ≤0.002            | 4             | 1           | 2          | 2            | 2            | 1              |
| <i>Fusarium solani</i>                              | 0.015             | >4            | >4          | >4         | >8           | >8           | 2              |
| <i>Fusarium solani</i>                              | 0.004             | 0.004         | 0.008       | 0.008      | >8           | 8            | 4              |
| <i>Fusarium solani</i> species complex              | 0.015             | >4            | >4          | 4          | >8           | 8            | 1              |

| Organism                                    | MIC or MEC (mg/L) |               |             |            |              |              |                |
|---------------------------------------------|-------------------|---------------|-------------|------------|--------------|--------------|----------------|
|                                             | Manogepix         | Anidulafungin | Caspofungin | Micafungin | Posaconazole | Voriconazole | Amphotericin B |
| <i>Fusarium solani</i> species complex      | 0.008             | >4            | >4          | >4         | >8           | 8            | 2              |
| <i>Fusarium solani</i> species complex      | 0.015             | >4            | >4          | >4         | >8           | 8            | 1              |
| <i>Fusarium solani</i> species complex      | 0.015             | >4            | >4          | 4          | >8           | 4            | 1              |
| <i>Fusarium solani</i> species complex      | 0.015             | >4            | >4          | >4         | >8           | >8           | 2              |
| <i>Gibberella fujikuroi</i> species complex | 0.008             | 0.008         | 0.008       | 0.004      | 2            | 4            | 2              |
| <i>Gibberella fujikuroi</i> species complex | 0.008             | >4            | >4          | >4         | >8           | >8           | 4              |
| <i>Gibberella fujikuroi</i> species complex | 0.008             | >4            | >4          | >4         | >8           | 8            | 2              |
| <i>Gibberella fujikuroi</i> species complex | 0.008             | >4            | >4          | >4         | >8           | >8           | 2              |
| <i>Gibberella fujikuroi</i> species complex | 0.015             | >4            | >4          | >4         | 1            | 2            | 2              |
| <i>Gibberella fujikuroi</i> species complex | 0.015             | >4            | >4          | >4         | >8           | 4            | 2              |
| <i>Lichtheimia corymbifera</i>              | 4                 | >4            | >4          | >4         | 0.5          | >8           | 0.5            |
| <i>Lomentospora prolificans</i>             | 0.06              | >4            | >4          | >4         | >8           | >8           | >4             |
| <i>Lomentospora prolificans</i>             | 0.03              | >4            | >4          | >4         | >8           | >8           | >4             |
| <i>Lomentospora prolificans</i>             | 0.06              | >4            | >4          | >4         | >8           | >8           | >4             |
| <i>Lomentospora prolificans</i>             | 0.06              | >4            | >4          | >4         | >8           | >8           | 4              |
| <i>Mucor circinelloides</i>                 | 1                 | >4            | >4          | >4         | 2            | >8           | 0.5            |
| <i>Mucor circinelloides</i>                 | 0.25              | >4            | >4          | >4         | >8           | >8           | 0.5            |

| Organism                                     | MIC or MEC (mg/L) |               |             |            |              |              |                |
|----------------------------------------------|-------------------|---------------|-------------|------------|--------------|--------------|----------------|
|                                              | Manogepix         | Anidulafungin | Caspofungin | Micafungin | Posaconazole | Voriconazole | Amphotericin B |
| <i>Mucor indicus</i>                         | 1                 | >4            | >4          | >4         | 1            | >8           | 0.5            |
| <i>Purpuricillium lilacinum</i>              | ≤0.002            | 0.03          | 0.03        | 0.015      | 0.25         | 0.06         | 2              |
| <i>Purpuricillium lilacinum</i>              | 0.008             | 0.06          | 0.03        | 0.03       | 0.5          | 0.25         | >4             |
| <i>Paecilomyces variotii</i>                 | 0.008             | 0.008         | 0.008       | 0.004      | 0.25         | 4            | 0.25           |
| <i>Paecilomyces variotii</i>                 | 0.004             | 0.008         | 1           | 0.004      | 0.5          | 8            | 0.25           |
| <i>Paecilomyces variotii</i>                 | 0.004             | 0.008         | 0.008       | 0.004      | 0.25         | 2            | 0.12           |
| <i>Paecilomyces variotii</i>                 | 0.004             | 0.008         | 1           | 0.004      | 0.25         | 4            | 0.12           |
| <i>Paecilomyces variotii</i>                 | 0.004             | 0.008         | 1           | 0.004      | 0.25         | 4            | 0.12           |
| <i>Paecilomyces variotii</i>                 | 0.004             | 0.008         | 1           | 0.008      | 0.5          | 4            | 0.25           |
| <i>Paecilomyces variotii</i>                 | 0.004             | 0.008         | 0.015       | 0.004      | 0.25         | 4            | 0.12           |
| <i>Penicillium citrinum</i>                  | 0.008             | 0.015         | 0.008       | 0.004      | 1            | >8           | 1              |
| <i>Penicillium onobense</i>                  | 0.008             | 0.008         | 0.015       | 0.015      | 0.25         | 0.5          | 1              |
| <i>Rasamsonia argillacea</i>                 | 0.004             | 0.008         | 0.008       | 0.008      | 2            | >8           | 2              |
| <i>Rasamsonia argillacea</i> species complex | ≤0.002            | 0.015         | 0.015       | 0.008      | 0.5          | 8            | 1              |
| <i>Rasamsonia argillacea</i> species complex | ≤0.002            | 0.03          | 0.015       | 0.015      | 1            | >8           | 1              |
| <i>Rasamsonia argillacea</i> species complex | 0.004             | 0.008         | 0.008       | 0.004      | 0.5          | >8           | 0.5            |
| <i>Rhizopus microsporus</i> group            | 2                 | >4            | >4          | >4         | 0.5          | 8            | 0.5            |
| <i>Rhizopus microsporus</i> group            | 2                 | >4            | >4          | >4         | 0.5          | 8            | 1              |

| Organism                               | MIC or MEC (mg/L) |               |             |            |              |              |                |
|----------------------------------------|-------------------|---------------|-------------|------------|--------------|--------------|----------------|
|                                        | Manogepix         | Anidulafungin | Caspofungin | Micafungin | Posaconazole | Voriconazole | Amphotericin B |
| <i>Rhizopus microsporus</i> group      | >8                | >4            | >4          | >4         | 1            | 8            | 1              |
| <i>Rhizopus microsporus</i> group      | >8                | >4            | >4          | >4         | 0.5          | 8            | 1              |
| <i>Rhizopus oryzae</i>                 | 4                 | >4            | >4          | >4         | 0.5          | 8            | 0.5            |
| <i>Rhizopus oryzae</i> species complex | >8                | >4            | >4          | >4         | 0.5          | >8           | 0.5            |
| <i>Scopulariopsis brevicaulis</i>      | 0.008             | 0.5           | 0.06        | 0.06       | >8           | >8           | 4              |
| Unspeciated <i>Acremonium</i>          | 0.25              | 0.5           | 0.12        | 0.12       | >8           | 8            | 2              |
| Unspeciated <i>Coprinellus</i>         | 0.008             | 4             | >4          | >4         | 0.25         | 0.015        | 0.12           |
| Unspeciated <i>Cunninghamella</i>      | 8                 | >4            | >4          | >4         | 1            | >8           | 2              |
| Unspeciated <i>Lichtheimia</i>         | 4                 | >4            | >4          | >4         | 1            | >8           | 0.5            |
| Unspeciated <i>Paecilomyces</i>        | ≤0.002            | 0.008         | 0.008       | 0.004      | 0.5          | >8           | 0.5            |
| Unspeciated <i>Trichoderma</i>         | 0.03              | 0.12          | 0.015       | 0.015      | 1            | 1            | 2              |
